# Supplementary material for: The Lung Immune Prognostic Index Discriminates Survival Outcomes in Patients with Solid Tumors Treated with Immune Checkpoint Inhibitors
Source: PubMed Central journal article supplement (PMC6896022; doi:10.3390/cancers11111713), 2019-11-02
Supplement: cancers-11-01713-s001.pdf [file cancers-11-01713-s001.pdf]

Article

# The Lung Immune Prognostic Index Discriminates Survival Outcomes in Patients with Solid Tumors Treated with Immune Checkpoint Inhibitors

Daniel E. Meyers <sup>1,†</sup>, Igor Stukalin <sup>1,†</sup>, Isabelle A. Vallerand <sup>1,2</sup>, Ryan T. Lewinson <sup>1,2,3</sup>, Aleksi Suo <sup>1</sup>, Michelle Dean <sup>1</sup>, Scott North <sup>4</sup>, Aliyah Pabani <sup>1</sup>, Tina Cheng <sup>1</sup>, Daniel Y.C. Heng <sup>1</sup>, D. Gwyn Bebb <sup>1</sup> and Don G. Morris <sup>1,\*</sup>

**Table S1.** Baseline clinical and demographic information in the non-small cell lung cancer (NSCLC), renal cell carcinoma (RCC) and melanoma cohorts.

| Parameter                        | NSCLC Cohort<br>(N = 302) | RCC Cohort<br>(N = 145) | Melanoma Cohort<br>(N = 131) |
|----------------------------------|---------------------------|-------------------------|------------------------------|
| <b>LIPI Group—n (%)</b>          |                           |                         |                              |
| Good (0)                         | 124 (41.1)                | 90 (55.9)               | 59 (41.3)                    |
| Intermediate (1)                 | 124 (41.1)                | 46 (28.6)               | 51 (35.7)                    |
| Poor (2)                         | 54 (17.8)                 | 9 (5.6)                 | 21 (14.7)                    |
| <b>ECOG PS—n (%)</b>             |                           |                         |                              |
| <2                               | 191 (63.2)                | 123 (84.8)              | 111 (84.7)                   |
| ≥2                               | 107 (35.4)                | 19 (13.1)               | 19 (14.5)                    |
| unknown                          | 4 (1.3)                   | 3 (2.1)                 | 1 (0.8)                      |
| <b>Age at start of Treatment</b> |                           |                         |                              |
| Median                           | 65.9                      | 64.2                    | 63.4                         |
| Range                            | 32–90                     | 36–86                   | 20–90                        |
| <70—no. (%)                      | 184 (60.9)                | 107 (73.8)              | 88 (67.2)                    |
| ≥70—no (%)                       | 118 (39.1)                | 38 (26.2)               | 43 (32.8)                    |
| <b>Treatment Line—n (%)</b>      |                           |                         |                              |
| 1                                | 85 (28.1)                 | 12 (8.3)                | 50 (38.2)                    |
| ≥2                               | 217 (71.9)                | 133 (91.7)              | 81 (61.8)                    |

ECOG PS: Eastern Cooperative Oncology Group performance status, LIPI: lung immune prognostic index

**Table S2.** Overall survival (OS) and progression-free survival (PFS) based on Lung Immune Prognostic Index (LIPI) group in the non-small cell lung cancer (NSCLC), renal cell carcinoma (RCC) and melanoma cohorts.

| Cohort                | Median OS *      | Median PFS *    |
|-----------------------|------------------|-----------------|
|                       | (95% CI)         | (95% CI)        |
| <b>NSCLC</b>          |                  |                 |
| Total                 | 8.4 (6.9–10.0)   | 4.3 (3.4–5.1)   |
| LIPI Good (0)         | 15.7 (13.2–21.6) | 9.7 (6.9–11.7)  |
| LIPI Intermediate (1) | 7.1 (5.7–9.0)    | 3.7 (2.5–5.0)   |
| LIPI Poor (2)         | 2.1 (1.4–3.0)    | 1.4 (1.1–2.0)   |
| <b>RCC</b>            |                  |                 |
| Total                 | 12.8 (7.6–19.2)  | 5.8 (4.1–7.8)   |
| LIPI Good (0)         | 35.1 (14.3–78.0) | 7.2 (5.0–11.3)  |
| LIPI Intermediate (1) | 16.1 (9.2–30.0)  | 4.6 (2.8–8.1)   |
| LIPI Poor (2)         | 4.6 (1.2–26.5)   | 2.3 (0.92–4.6)  |
| <b>Melanoma</b>       |                  |                 |
| Total                 | 12.8 (7.6–19.2)  | 3.3 (2.6–6.0)   |
| LIPI Good (0)         | 32.3 (24.8–NR)   | 14.0 (6.0–24.8) |
| LIPI Intermediate (1) | 7.2 (3.6–12.1)   | 2.6 (1.9–4.1)   |
| LIPI Poor(2)          | 2.4 (0.69–3.7)   | 1.4 (0.70–2.5)  |

CI: confidence interval, LIPI: lung immune prognostic index, OS: overall survival, PFS: progression-free survival; \* Values expressed in months.

**Table S3.** Multivariate analysis of factors associated with overall survival (OS) and progression-free survival (PFS) in the non-small cell lung cancer (NSCLC) cohort.

| Parameter             | OS              |         | PFS             |         |
|-----------------------|-----------------|---------|-----------------|---------|
|                       | HR (95% CI)     | p Value | HR (95% CI)     | p Value |
| <b>LIPI Group</b>     |                 |         |                 |         |
| Good (0)              | 1.0 (reference) |         | 1.0 (reference) |         |
| Intermediate (1)      | 1.6 (1.1–2.1)   | 0.005   | 1.4 (1.0–1.8)   | 0.037   |
| Poor (2)              | 4.1(2.8–6.0)    | <0.001  | 3.0 (2.1–4.4)   | <0.001  |
| <b>ECOG PS</b>        |                 |         |                 |         |
| <2                    | 1.0 (reference) |         | 1.0 (reference) |         |
| ≥2                    | 2.9 (2.2–3.9)   | <0.001  | 2.3 (1.7–3.0)   | <0.001  |
| <b>Age</b>            |                 |         |                 |         |
| <70                   | 1.0 (reference) |         | 1.0 (reference) |         |
| ≥70                   | 0.9 (0.7–1.2)   | 0.59    | 1.0 (0.8–1.4)   | 0.75    |
| <b>Treatment Line</b> |                 |         |                 |         |
| 1                     | 1.0 (reference) |         | 1.0 (reference) |         |
| ≥2                    | 1.2 (0.9–1.6)   | 0.24    | 1.4 (1.0–1.8)   | 0.035   |

CI: confidence interval, ECOG PS: Eastern Cooperative Oncology Group performance status HR: hazard ratio, LIPI: lung immune prognostic index, OS: overall survival, PFS: progression-free survival.

**Table S4.** Multivariate analysis of factors associated with overall survival (OS) and progression-free survival (PFS) in the renal cell carcinoma (RCC) cohort.

| Parameter         | OS              |         | PFS             |         |
|-------------------|-----------------|---------|-----------------|---------|
|                   | HR (95% CI)     | p value | HR (95% CI)     | p Value |
| <b>LIPI Group</b> |                 |         |                 |         |
| Good (0)          | 1.0 (reference) |         | 1.0 (reference) |         |
| Intermediate (1)  | 1.4 (0.8–2.4)   | 0.25    | 1.2 (0.8–1.9)   | 0.33    |
| Poor (2)          | 3.1 (1.4–6.8)   | 0.004   | 3.8 (1.8–7.9)   | <0.001  |
| <b>ECOG PS</b>    |                 |         |                 |         |

|                       |                 |       |                 |       |
|-----------------------|-----------------|-------|-----------------|-------|
| <2                    | 1.0 (reference) |       | 1.0 (reference) |       |
| ≥2                    | 2.6 (1.4–4.9)   | 0.003 | 2.3 (1.3–3.9)   | 0.002 |
| <b>Age</b>            |                 |       |                 |       |
| <70                   | 1.0 (reference) |       | 1.0 (reference) |       |
| ≥70                   | 0.9 (0.5–1.5)   | 0.66  | 0.7 (0.4–1.1)   | 0.17  |
| <b>Treatment Line</b> |                 |       |                 |       |
| 1                     | 1.0 (reference) |       | 1.0 (reference) |       |
| ≥2                    | 4.0 (0.9–16.8)  | 0.056 | 1.3 (0.6–2.8)   | 0.44  |

CI: confidence interval, ECOG PS: Eastern Cooperative Oncology Group performance status HR: hazard ratio, LIPI: lung immune prognostic index, OS: overall survival, PFS: progression-free survival.

**Table S5.** Multivariate analysis of factors associated with overall survival (OS) and progression-free survival (PFS) in the melanoma cohort.

| Parameter             | OS              |         | PFS             |         |
|-----------------------|-----------------|---------|-----------------|---------|
|                       | HR (95% CI)     | p Value | HR (95% CI)     | p Value |
| <b>LIPI Group</b>     |                 |         |                 |         |
| Good (0)              | 1.0 (reference) |         | 1.0 (reference) |         |
| Intermediate (1)      | 3.3 (2.0–5.3)   | <0.001  | 2.2 (1.4–3.4)   | <0.001  |
| Poor (2)              | 7.9 (4.1–15.2)  | <0.001  | 5.6 (3.0–10.1)  | <0.001  |
| <b>ECOG PS</b>        |                 |         |                 |         |
| <2                    | 1.0 (reference) |         | 1.0 (reference) |         |
| ≥2                    | 1.4 (0.8–2.5)   | 0.25    | 1.3 (0.7–2.2)   | 0.39    |
| <b>Age</b>            |                 |         |                 |         |
| <70                   | 1.0 (reference) |         | 1.0 (reference) |         |
| ≥70                   | 0.6 (0.4–1.0)   | 0.034   | 0.7 (0.4–1.0)   | 0.070   |
| <b>Treatment Line</b> |                 |         |                 |         |
| 1                     | 1.0 (reference) |         | 1.0 (reference) |         |
| ≥2                    | 1.5 (1.0–2.4)   | 0.072   | 1.1 (0.7–1.6)   | 0.72    |

CI: confidence interval, ECOG PS: Eastern Cooperative Oncology Group performance status HR: hazard ratio, LIPI: lung immune prognostic index, OS: overall survival, PFS: progression-free survival.

**Table S6.** Multivariate analysis of factors associated with objective response rate (ORR) in the non-small cell lung cancer (NSCLC), renal cell carcinoma (RCC) and melanoma cohorts.

| Parameter             | ORR             |         |                 |         |                 |         |
|-----------------------|-----------------|---------|-----------------|---------|-----------------|---------|
|                       | NSCLC           |         | RCC             |         | Melanoma        |         |
|                       | OR (95% CI)     | P Value | OR (95% CI)     | p Value | OR (95% CI)     | p Value |
| <b>LIPI Group</b>     |                 |         |                 |         |                 |         |
| Good (0)              | 1.0 (reference) |         | 1.0 (reference) |         | 1.0 (reference) |         |
| Intermediate (1)      | 1.1 (0.59–2.0)  | 0.80    | 1.3 (0.52–3.2)  | 0.59    | 5.3 (2.1–13.5)  | <0.001  |
| Poor (2)              | 9.1 (2.1–40.5)  | 0.004   | *               | *       | 11.2 (2.2–57.6) | 0.004   |
| <b>ECOG PS</b>        |                 |         |                 |         |                 |         |
| <2                    | 1.0 (reference) |         | 1.0 (reference) |         | 1.0 (reference) |         |
| ≥2                    | 2.3 (0.95–5.75) | 0.064   | 1.2 (0.46–3.1)  | 0.72    | 4.0 (1.5–10.7)  | 0.006   |
| <b>Age</b>            |                 |         |                 |         |                 |         |
| <70                   | 1.0 (reference) |         | 1.0 (reference) |         | 1.0 (reference) |         |
| ≥70                   | 0.92 (0.51–1.7) | 0.78    | 0.75 (0.30–1.9) | 0.54    | 0.52 (0.20–1.4) | 0.19    |
| <b>Treatment Line</b> |                 |         |                 |         |                 |         |
| 1                     | 1.0 (reference) |         | 1.0 (reference) |         | 1.0 (reference) |         |
| ≥2                    | 2.9 (1.6–5.2)   | <0.001  | 1.6 (0.38–7.1)  | 0.66    | 1.9 (0.77–4.6)  | 0.17    |

CI: confidence interval, ECOG PS: Eastern Cooperative Oncology Group performance status, LIPI: lung immune prognostic index, OR: odds ratio, ORR: objective response rate; \* OR was not reportable for Poor LIPI (RCC) due to insufficient sample size.
